# Supplementary material
Source: PubMed Central journal article supplement (PMC2346493)
Supplement: pmed.0050078.sd001.pdf [file pmed.0050078.sd001.pdf]

# Long-term interleukin-6 levels and subsequent risk of coronary heart disease

## An abbreviated protocol for a systematic review

**Background:** There are conflicting data about whether there is an association between circulating levels of interleukin-6 (IL-6) and subsequent risk of coronary heart disease (CHD).

**Objectives:** Updated meta-analysis of prospective studies of IL-6 and CHD in general populations to support analyses in data from Reykjavik Study and British Regional Heart Study.

**Study selection:** Prospective studies: cohort, "nested" case-control or "nested" case-cohort studies.

**Participants:** Studies conducted in essentially general populations (ie, in which participants were not selected on the basis of previous disease) and at least one year follow-up.

**Exposure of interest:** IL-6 measured in samples taken at baseline survey.

**Outcome measures:** CHD defined as nonfatal myocardial infarction or coronary death.

**Search strategy:** Search electronic databases, not limited to the English language, using MEDLINE, EMBASE and Science Citation Index; hand search relevant reference lists, papers and journals.

Search terms:

- MeSH search terms:
  - myocardial ischemia
  - Interleukin-6
- 'free' terms:
  - myocardial infarction, MI
  - coronary heart disease, CHD
  - Heart attack
  - Ischaemia, ischemia
  - IL6, IL-6, IL 6
  - interleukin 6, Interleukin6, interleukin-6

**Data extraction:** Data will be extracted on study design, geographic location, publication date, sample population, sampling methods (ie, complete, random, etc), sample source (plasma/serum), nature of sample (ie, fresh or frozen, storage temp), fasting status at time of blood sampling (duration of any fasting), blinding of lab worker to case/control status, assay type, source and standard, analysis methods and units, case definition, any matching criteria, sample size (of total cohort and numbers with IL-6 measurements), numbers of cases (total, fatal CHD, non-fatal MI), numbers of controls, mean age, sex, time of baseline survey, duration of follow-up, mean or median IL-6 values, adjustment of confounders and summary statistics.

**Methods:** 2 reviewers will independently conduct the search, select publications and extract data using the data abstraction form (attached). Any differences will be resolved by a third reviewer.

Interleukin-6 levels (and other continuous outcomes) will be presented as mean (standard deviation), log mean (log standard deviation) or median (interquartile range) in controls; dichotomous outcomes will be presented as n (%). Odds and hazard ratios are assumed to approximate the same measure of relative risk, and all effect measures will be converted to a common format for comparison (ie, odds or risk ratios per 2 standard deviation increase in IL-6). A random effects model will be used in the meta-analysis, and the summary measure will be a 2 standard deviation increase in IL-6, approximately comparable to top versus bottom third. Subsidiary analysis will include adjusting each estimate by a conservative RDR from the BRHS and Reykjavik Studies.

Heterogeneity will be assessed using standard  $\chi^2$  tests and the  $I^2$  statistic. Subgroup analysis will be conducted to investigate the effects of different sampling populations and methods, duration of follow-up, source and type of IL-6 assay, blood storage temperature, geographical region, number of cases, sex, degree of adjustment of other cardiovascular risk factors, and whether individuals with CHD at baseline were excluded from analysis, on the results.

Initials

**Data Abstraction Form****Prospective Studies of IL-6 plasma values and CHD**

Study name:

First author, year

Location

Population  
framework

Population/Workforce/Other

Sampling method  
(circle appropriate  
answer)

Random/Complete/Other

Size of cohort

Total:  
Blood taken from:

Exclusion criteria

If nested case-control,  
no. of controlsAge  
range in  
cohortTime of baseline  
survey (may be a  
range)% male in  
cohortMean  
duration of  
follow-up (yrs)

No. CHD cases

TOTAL \_\_\_\_\_

Fatal CHD \_\_\_\_\_

Confirmed non-fatal MI \_\_\_\_\_

Probable non-fatal MI \_\_\_\_\_

Case  
defnMatching  
criteria (if  
applicable)

Fasting

Yes if Yes, mean duration \_\_\_\_\_  
No  
Not stated

Plasma

Serum

Lab worker  
blindingYes  
No  
Not stated

Assay source

Assay type

Standard

Nature of  
sampleFresh (i.e. not deep frozen yet)  
Frozen, if Frozen, storage temperature \_\_\_\_\_Mean age  
cases (at  
baseline and/or  
event)% male of  
cases**Confounder legend**+ age & sex  
++ plus smoking  
+++ plus classic risk factors  
++++ plus CRPMean (SD)  
and/or log mean  
(log SD) plasma  
IL-6 values in  
controls

Summary statistics
